# Supplementary material
Source: PubMed Central journal article supplement (PMC9772102)

**Supplementary Figure 1. Association of Overall Survival with ASXL1 Mutation in Myeloid Cells, T Lymphocytes, or Both**

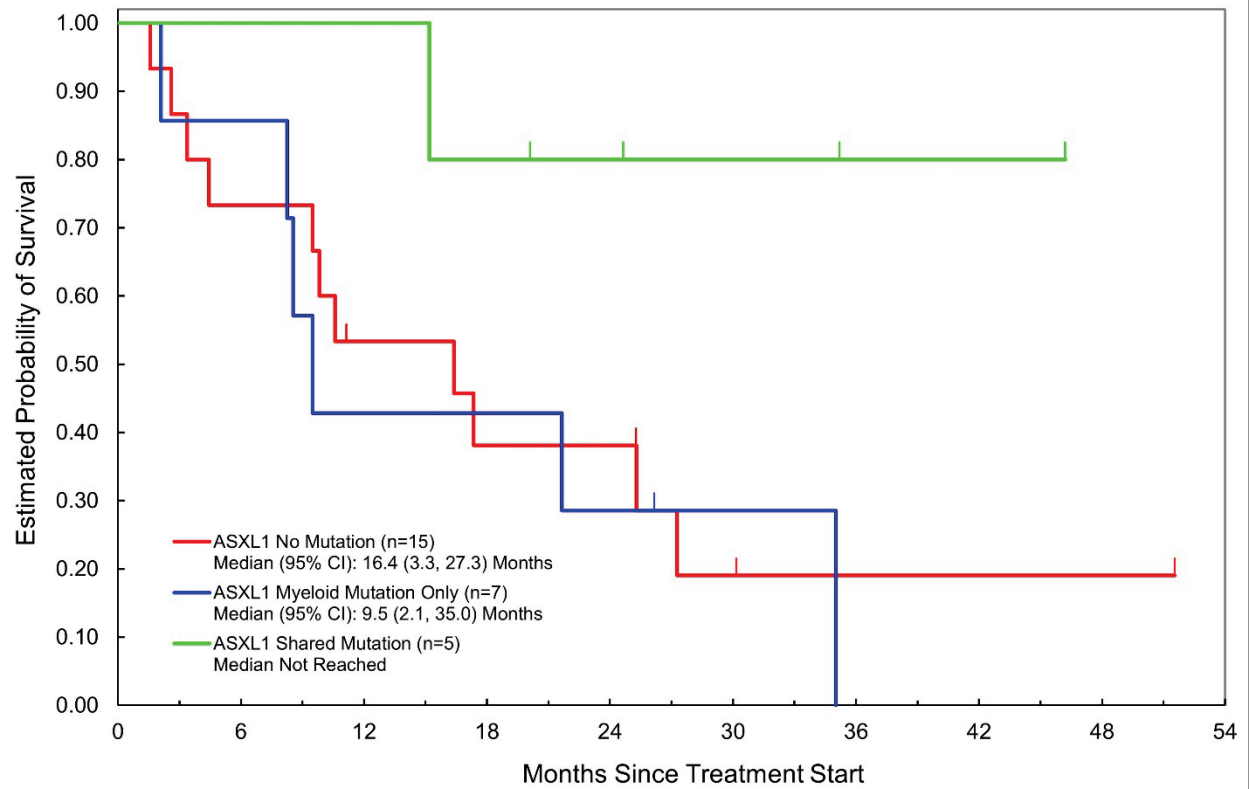

Supplement: NIHMS1843717-supplement-Supplementary_Figure_1.pdf [file NIHMS1843717-supplement-Supplementary_Figure_1.pdf]
