# Supplementary material
Source: PubMed Central journal article supplement (PMC9772102)

## Supplementary Figure 2. Flow Cytometry Characteristics of T cells at Baseline and During Treatment

**A**

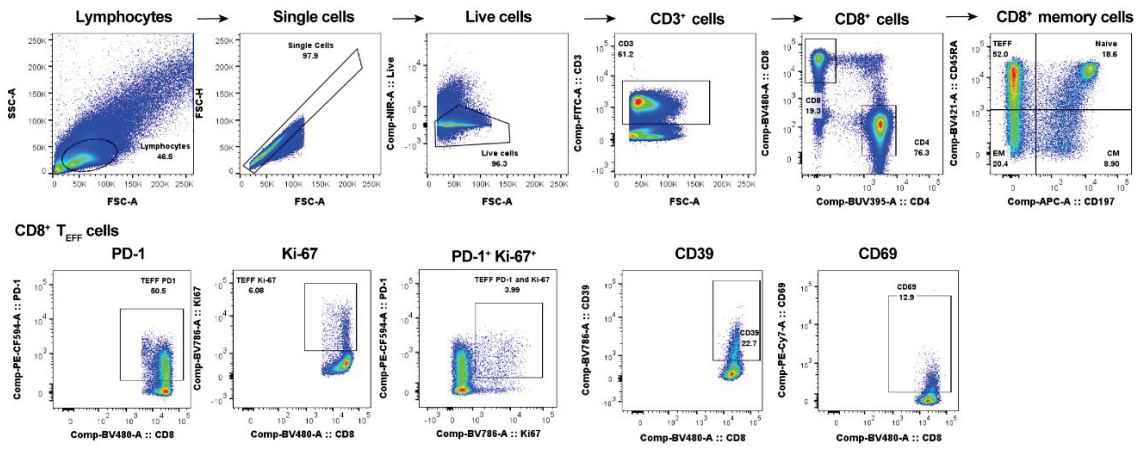

**B**

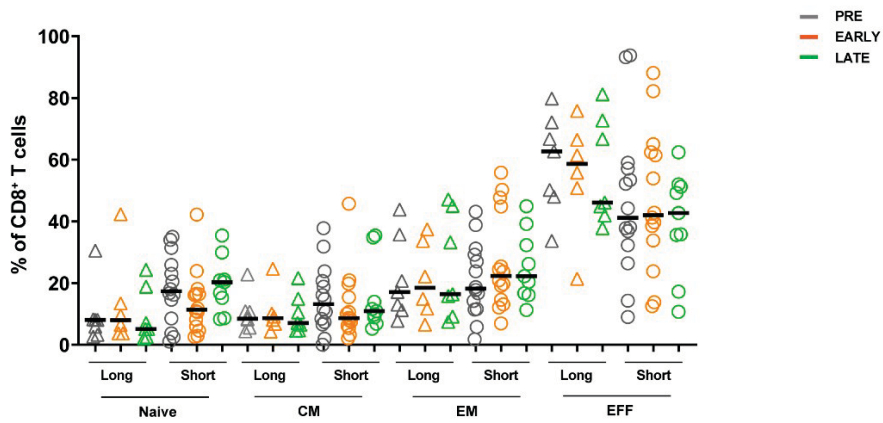

**C**

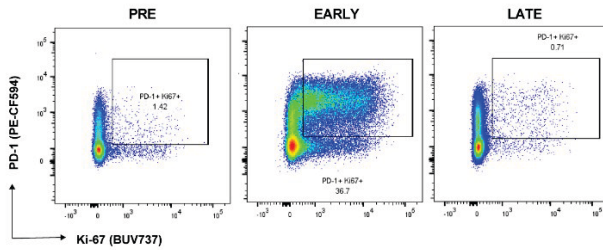

Supplement: NIHMS1843717-supplement-Supplementary_Figure_2.pdf [file NIHMS1843717-supplement-Supplementary_Figure_2.pdf]
