# Supplementary material
Source: PubMed Central journal article supplement (PMC9772102)
Supplement: NIHMS1843717-supplement-Supplementary_Table_1.pdf [file NIHMS1843717-supplement-Supplementary_Table_1.pdf]

**Supplementary Table 1.**  
Specific genes sequenced  
in bone marrow  
mononuclear cells.

ASXL1  
BCOR  
BCORL1  
CALR  
CEBPA  
CHEK2  
CSF3R  
CUX1  
DDX41  
DNMT3A  
ETV6  
EZH2  
FLT3  
GATA2  
IDH1  
IDH2  
IKZF1  
JAK2  
KIT  
KRAS  
MPL  
NF1  
NPM1  
NRAS  
PHF6  
PTPN11  
PPM1D  
RAD51  
RUNX1  
SETBP1  
SF3B1  
SH2B3  
SRSF2  
STAG2  
TET2  
TP53  
U2AF1  
WT1  
ZRSR2  
CBL
