# Supplementary material
Source: PubMed Central journal article supplement (PMC9772102)
Supplement: NIHMS1843717-supplement-Supplementary_Table_2.pdf [file NIHMS1843717-supplement-Supplementary_Table_2.pdf]

**Supplementary Table 2.** Grade 3 or Higher Toxicities or Toxicities Observed in 10% or More Patients – Excluding Those Defined as Unrelated or Unlikely Related to Protocol Treatment

| Toxicity                             | Any Grade (%) | Grade 3 (%) | Grade 4 (%) | Grade 5 (%) |
|--------------------------------------|---------------|-------------|-------------|-------------|
| Thrombocytopenia                     | 39%           | 9%          | 24%         |             |
| Anemia                               | 30%           | 21%         | 9%          |             |
| Neutropenia                          | 30%           | 6%          | 24%         |             |
| Anorexia                             | 27%           |             |             |             |
| Fatigue                              | 27%           | 9%          |             |             |
| Injection Site Reaction              | 27%           |             |             |             |
| Nausea                               | 27%           |             |             |             |
| Diarrhea                             | 24%           | 3%          |             |             |
| Febrile Neutropenia                  | 24%           | 24%         |             |             |
| Leukopenia                           | 24%           | 6%          | 18%         |             |
| Vomiting                             | 21%           |             |             |             |
| Fever                                | 18%           | 6%          |             |             |
| Alkaline Phosphatase Increased       | 15%           |             |             |             |
| Bruising                             | 15%           |             |             |             |
| Headache                             | 15%           |             |             |             |
| Mucositis Oral                       | 15%           |             |             |             |
| Alanine Aminotransferase Increased   | 12%           |             |             |             |
| Aspartate Aminotransferase Increased | 12%           |             |             |             |
| Dizziness                            | 12%           |             |             |             |
| Dyspnea                              | 12%           |             |             |             |
| Hyperglycemia                        | 12%           |             |             |             |
| Pruritus                             | 12%           |             |             |             |
| Rash Maculo-Papular                  | 12%           |             |             |             |
| Weight Loss                          | 12%           |             |             |             |
| Autoimmune Encephalitis              | 6%            | 6%          |             |             |
| Cellulitis                           | 6%            | 6%          |             |             |
| Hypoxia                              | 6%            | 6%          |             |             |
| Pneumonitis                          | 6%            | 6%          |             |             |
| Bowel Perforation                    | 3%            | 3%          |             |             |
| Brainstem Herniation                 | 3%            |             |             | 3%          |
| Hematoma                             | 3%            | 3%          |             |             |
| Hematuria                            | 3%            | 3%          |             |             |
| Hyponatremia                         | 3%            | 3%          |             |             |
| Leukocytosis                         | 3%            | 3%          |             |             |
| Lung Infection                       | 3%            | 3%          |             |             |
| Lymphocytopenia                      | 3%            | 3%          |             |             |
| Multi-Organ Failure                  | 3%            |             | 3%          |             |
| Neutropenic Fever                    | 3%            | 3%          |             |             |
| Oral Thrush                          | 3%            | 3%          |             |             |
| Pain - Hip                           | 3%            | 3%          |             |             |
| Respiratory Distress                 | 3%            | 3%          |             |             |
| Seizure                              | 3%            | 3%          |             |             |
| Sepsis                               | 3%            |             |             | 3%          |
| Tachypnea                            | 3%            | 3%          |             |             |
| Tumor Lysis Syndrome                 | 3%            | 3%          |             |             |
| Upper GI Bleeding                    | 3%            | 3%          |             |             |
