# Supplementary material
Source: PubMed Central journal article supplement (PMC9772102)
Supplement: NIHMS1843717-supplement-Supplementary_Table_3.pdf [file NIHMS1843717-supplement-Supplementary_Table_3.pdf]

Supplementary Table 3. List of Patients Who Experienced Immune-related Adverse Events AEs

| ID             | Toxicity                | Maximum Grade Observed | First Onset Since Treatment Start (Months) | Dose of Atezolizumab Received Prior to Immune AE Observed | Recovered in Days | Treatment Given                                                                                                                                                                        |
|----------------|-------------------------|------------------------|--------------------------------------------|-----------------------------------------------------------|-------------------|----------------------------------------------------------------------------------------------------------------------------------------------------------------------------------------|
| 115585         | Arthritis               | 2                      | 9.4 (C9D26)                                | 15                                                        | 7                 | Prednisone 10mg started on 9/8/18 during cycle 9, then was continued on a slow taper and stopped on 12/26/19                                                                           |
| 116467         | Rash Maculo-Papular     | 1                      | 6.1 (C8D4)                                 | 14                                                        | 1                 | None                                                                                                                                                                                   |
| 117593         | Autoimmune Encephalitis | 3                      | 0.7 (C1D24)                                | 2                                                         | 8                 | Patient was then taken off treatment after the AE was resolved. No treatment information available in database for this immune AE                                                      |
| 118075         | Pneumonitis             | 3                      | 1.5 (C2D22)                                | 3                                                         | Unknown           | Methylprednisolone, 125 mg, IV, once, given on the day of immune AE observed, then 40 mg Q12H, PRN. Patient was then taken off protocol treatment                                      |
| 118877         | Rash Maculo-Papular     | 1                      | 0.6 (C1D20)                                | 1                                                         | Unknown           | None                                                                                                                                                                                   |
| 119107         | Autoimmune Encephalitis | 3                      | 0.7 (C1D25)                                | 1                                                         | 16                | Methylprednisolone, 20mg Q6H, IV, given on the 2 <sup>nd</sup> day of immune AE, x3 days, then 70mg QD, IV, x2 days then Prednisone 70mg QD, Oral, x2 days for encephalitis infection. |
| 119116         | Rash Maculo-Papular     | 1                      | 0.2 (C1D8)                                 | 1                                                         | 18                | None                                                                                                                                                                                   |
| 121015         | Hypothyroidism          | 2                      | 4.8 (C5D30)                                | 10                                                        | Unknown           | Levothyroxine for hypothyroidism, and Hydrocortisone 10mg, bid, oral, given in 2 months after hypothyroidism observed for thyroiditis,                                                 |
| 121474         | Pneumonitis             | 3                      | 0.8 (C1D28)                                | 11                                                        | 18                | Patient was taken off protocol therapy on day 20 due to other AEs prior to pneumonitis observed. No treatment for pneumonitis was documented in database                               |
| 121535         | Rash Maculo-Papular     | 1                      | 2.8 (C3D25)                                | 5                                                         | 21                | None                                                                                                                                                                                   |
| 121589         | Colitis                 | 2                      | 3.3 (C4D12)                                | 6                                                         | Unknown           | None                                                                                                                                                                                   |
| 122739         | Hyperthyroidism         | 1                      | 1.0 (C1D29)                                | 2                                                         | 28                | Methimazole                                                                                                                                                                            |
| Median (Range) |                         |                        | 1.2 (0.2 -9.4) Months                      | 4 (1 – 15) Doses                                          | 17 (1 – 28) Days  |                                                                                                                                                                                        |
