# Supplementary material
Source: PubMed Central journal article supplement (PMC9772102)

Supplementary Figure 3. Expression of PD-1, CD39 and CD69 in CD8+ T cells by Gender

A

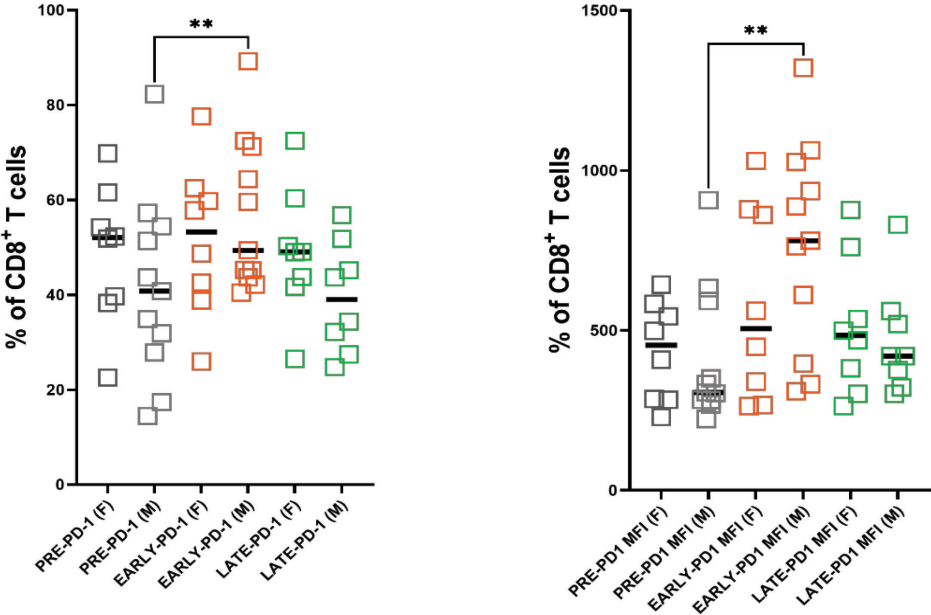

B

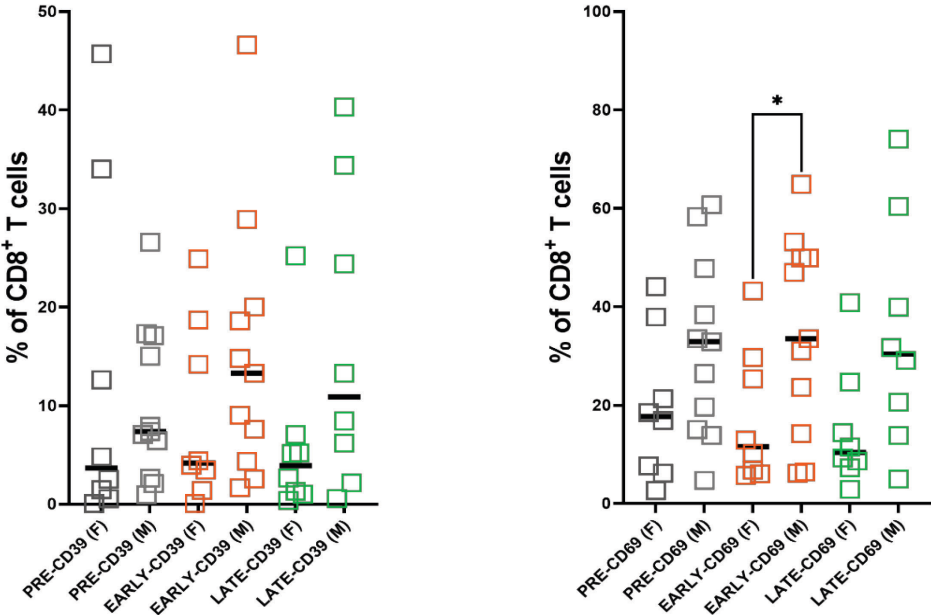

Supplement: NIHMS1843717-supplement-Supplementary_Figure_3.pdf [file NIHMS1843717-supplement-Supplementary_Figure_3.pdf]

Supplementary Figure 4. Flow Cytometry Characteristics of NK cells.

A

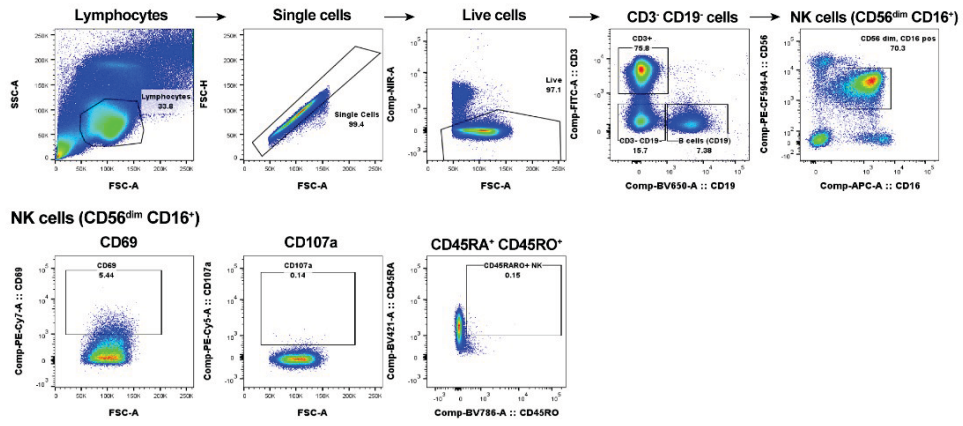

B

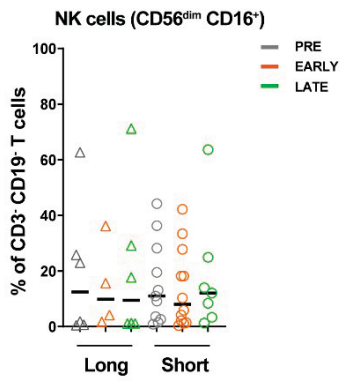

C

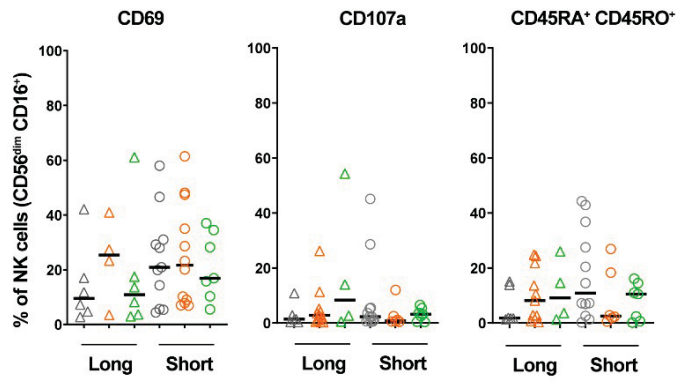

Supplement: NIHMS1843717-supplement-Supplementary_Figure_4.pdf [file NIHMS1843717-supplement-Supplementary_Figure_4.pdf]
